# Supplementary material
Source: Royal Society of Chemistry journal article supplement (doi:10.1039/d6ay00101g)
Supplement: d6ay00101g1.pdf [file d6ay00101g1.pdf]

1 **Supplementary Material**

2  
3 **A green analytical assay for the quantitation of bioavailable phosphorus**  
4 **in soils: *in situ* extraction and smartphone-based measurement**

5  
6 Stella Sales Macedo\*, Edilene Cristina Ferreira\*, Arnaldo Alves Cardoso\*<sup>a</sup>

7 \*São Paulo State University (UNESP), Rua Francisco Degni 55, Araraquara,  
8 SP, 14800-970, Brazil

9

10 **Table S1.** (a) Particle size fractions and (b) chemical properties of the certified soil samples  
11 used in this study.

12 (a)

| Sample | Clay | Silt | Sand  |        |      |
|--------|------|------|-------|--------|------|
|        |      |      | Total | Coarse | Fine |
| g/kg   |      |      |       |        |      |
| 549    | 387  | 95   | 516   | 342    | 174  |
| 555    | 395  | 255  | 345   | 87     | 251  |
| 560    | 388  | 96   | 516   | 342    | 176  |
| 564    | 271  | 91   | 638   | 351    | 285  |
| 574    | 487  | 226  | 284   | 196    | 88   |
| 583    | 390  | 93   | 516   | 343    | 176  |
| 586    | 416  | 245  | 339   | 136    | 200  |

13

14

15 (b)

| Sample | P resin            | OM                | pH CaCl <sub>2</sub> | K                    | Ca  | Mg | H+Al | Al | S phosphate        | B    | Cu  | Fe  | Zn   | Na                   | Si                 |
|--------|--------------------|-------------------|----------------------|----------------------|-----|----|------|----|--------------------|------|-----|-----|------|----------------------|--------------------|
|        | mg/dm <sup>3</sup> | g/dm <sup>3</sup> |                      | mmol/dm <sup>3</sup> |     |    |      |    | mg/dm <sup>3</sup> |      |     |     |      | mmol/dm <sup>3</sup> | mg/dm <sup>3</sup> |
| 549    | 100                | 24                | 5.1                  | 5                    | 33  | 11 | 34   | 0  | 5                  | 0.26 | 2.6 | 42  | 3.6  | 0.1                  | 7                  |
| 555    | 78                 | 23                | 4.9                  | 6.7                  | 41  | 22 | 41   | 1  | 12                 | 0.57 | 3.5 | 143 | 6.6  | 0.1                  | 17                 |
| 560    | 119                | 23                | 5.1                  | 5.3                  | 3.4 | 11 | 35   | 0  | 5                  | 0.27 | 2.7 | 41  | 4    | 0.1                  | 7                  |
| 564    | 48                 | 29                | 4.7                  | 1.1                  | 25  | 7  | 40   | 1  | 5                  | 0.26 | 3.5 | 122 | 6.4  | 0.1                  | 1                  |
| 574    | 160                | 52                | 5.2                  | 9.4                  | 65  | 34 | 37   | 0  | 8                  | 0.37 | 4.2 | 236 | 13.3 | 0.2                  | 16                 |
| 583    | 115                | 24                | 5.1                  | 5.3                  | 36  | 12 | 34   | 0  | 7                  | 0.28 | 2.9 | 41  | 3.9  | 0.2                  | 7                  |
| 586    | 130                | 44                | 5.9                  | 6.4                  | 83  | 37 | 22   | 0  | 7                  | 0.4  | 5.1 | 57  | 7.7  | 0.2                  | 20                 |

16

17 OM= organic matter determined by the Walkley–Black method; pH CaCl<sub>2</sub>: soil pH measured  
18 in 0.01 mol L<sup>-1</sup> CaCl<sub>2</sub>; P-resin: available phosphorus extracted by the ion-exchange resin  
19 method; Ca, Mg and K: exchangeable calcium, magnesium and potassium extracted by ion-

20 exchange resin; H+Al: potential acidity determined by SMP buffer or calcium acetate  
 21 extraction; Al: exchangeable aluminum extracted with KCl; S-SO<sub>4</sub><sup>2-</sup>: sulfate extracted as  
 22 calcium phosphate; B: boron extracted with hot water; Cu, Fe, Mn and Zn: available  
 23 micronutrients extracted with DTPA. All analyses were performed by the Agronomic  
 24 Institute of Campinas (IAC), Campinas, Brazil, following the standard methods adopted in  
 25 its Soil Proficiency Testing Program.

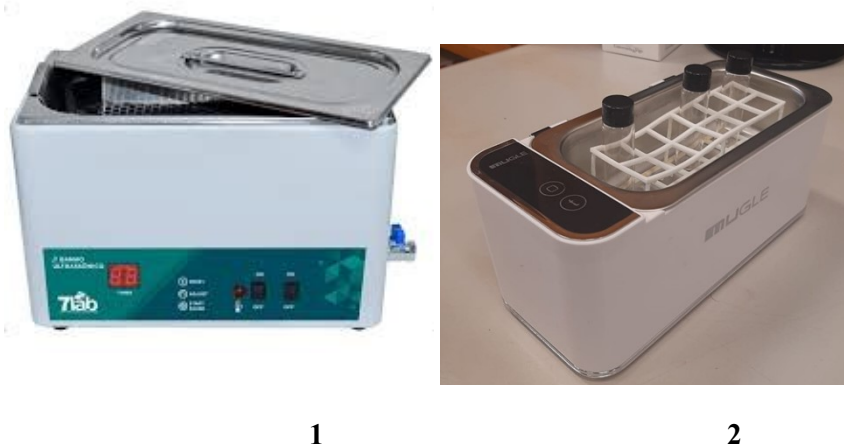

26  
 27

28 **Figure S1.** Photographs of the ultrasonic baths used in the sample preparation experiments:  
 29 (1) ultrasonic bath 1 (USC-1400, UNIQUE); (2) ultrasonic bath 2 (YT-80 ultrasonic cleaner).

30

31 **Table S2.** Chemical properties of certified soil sample A555 employed in the optimization  
 32 of extraction using ultrasonic bath 2, performed according to the 2<sup>3</sup> factorial design.

| Sample | pH CaCl <sub>2</sub> | P resin<br>mg/dm <sup>3</sup> | Ca<br>mmol/dm <sup>3</sup> | H+Al<br>mmol/dm <sup>3</sup> | Fe<br>mg/dm <sup>3</sup> |
|--------|----------------------|-------------------------------|----------------------------|------------------------------|--------------------------|
| 555    | 4.9                  | 78                            | 41                         | 41                           | 143                      |

33  
 34

|            |            |
|------------|------------|
| <b>(a)</b> | <b>(b)</b> |
|------------|------------|

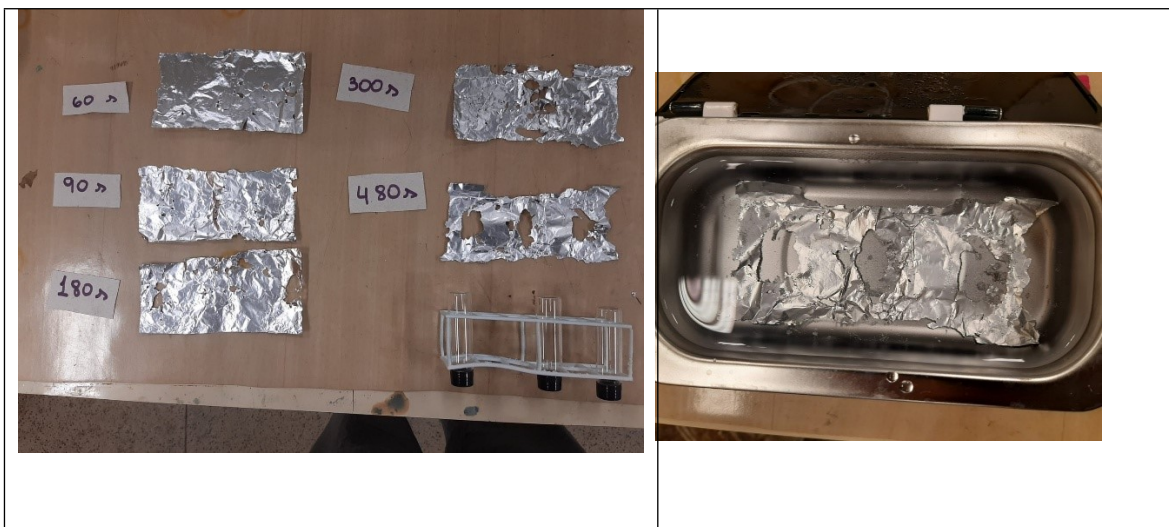

35

36 **Figure S2.** (a) Aluminum foils removed after different sonication times in tests performed  
 37 with the portable ultrasonic bath to evaluate the distribution and intensity of cavitation within  
 38 the tank. (b) Image of the aluminum foil after 480 s of sonication, showing perforations and  
 39 eroded areas that indicate regions of higher cavitation activity in the ultrasonic bath.

40

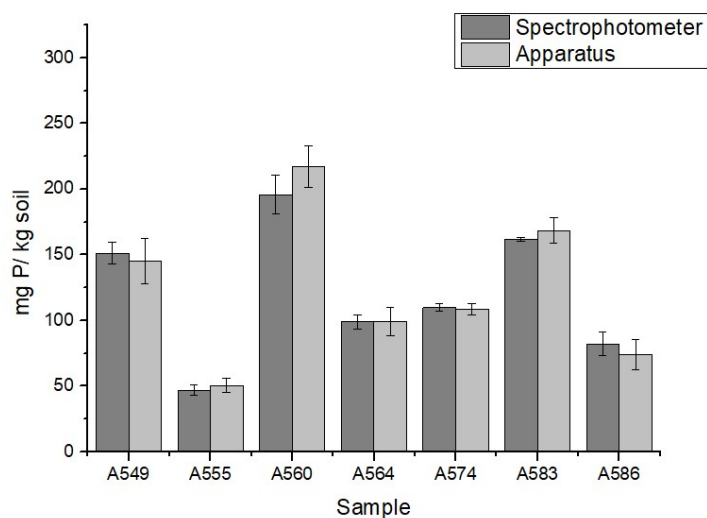

41

42 **Figure S3.** Column graph comparing the available phosphorus values obtained by the  
 43 spectrophotometric and DIP methods, using the analytical signal:  $S = -\log(R/R_0)$ .

44

45 **Table S3.** Phosphorus concentrations ( $\text{mg P kg}^{-1}$  soil, mean  $\pm$  standard deviation) determined  
 46 by the reference spectrophotometric method and by the proposed Digital Image Processing  
 47 (DIP) method using the portable apparatus. Measurements were performed in triplicate ( $n =$   
 48 3). The data were used for statistical comparison by analysis of variance (ANOVA).

| Sample | Spectrophotometry                          |             | Apparatus |              |
|--------|--------------------------------------------|-------------|-----------|--------------|
|        | mg P $\text{kg}^{-1}$ soil (mean $\pm$ SD) |             |           |              |
| 549    | 151.07                                     | $\pm 8.18$  | 145.18    | $\pm 17.3$   |
| 555    | 46.84                                      | $\pm 3.997$ | 50.5      | $\pm 5.34$   |
| 560    | 195.64                                     | $\pm 14.82$ | 271.4     | $\pm 15.88$  |
| 564    | 98.803                                     | $\pm 5.53$  | 98.793    | $\pm 10.809$ |
| 574    | 109.837                                    | $\pm 2.637$ | 108.42    | $\pm 4.133$  |
| 583    | 161.85                                     | $\pm 1.356$ | 168.38    | $\pm 9.63$   |
| 586    | 82.11                                      | $\pm 8.9$   | 74.01     | $\pm 11.308$ |

49

50

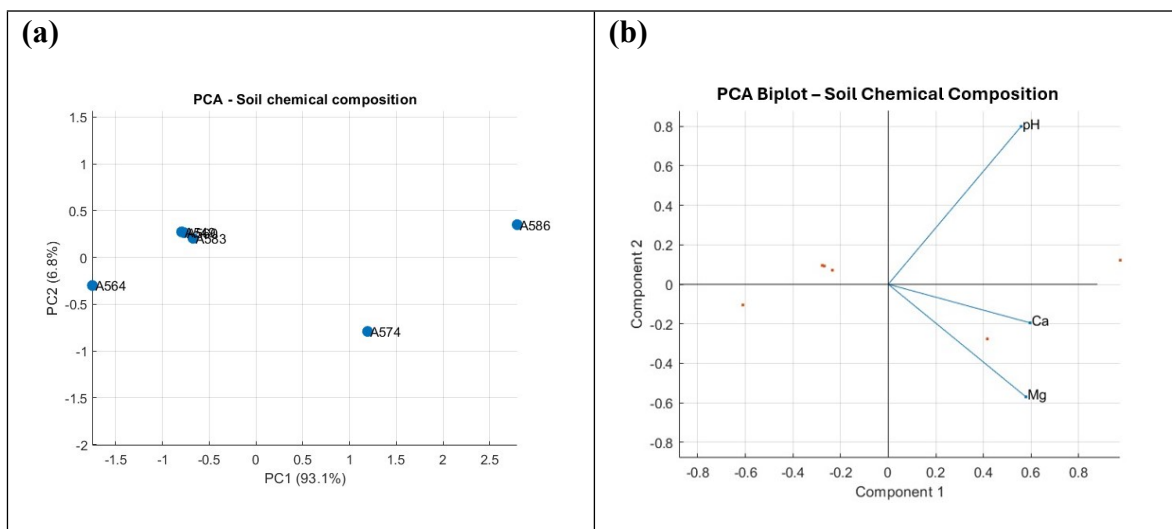

51

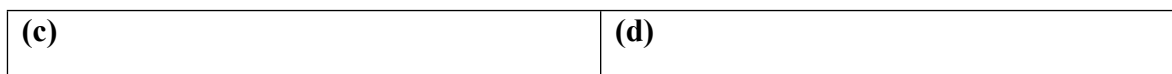

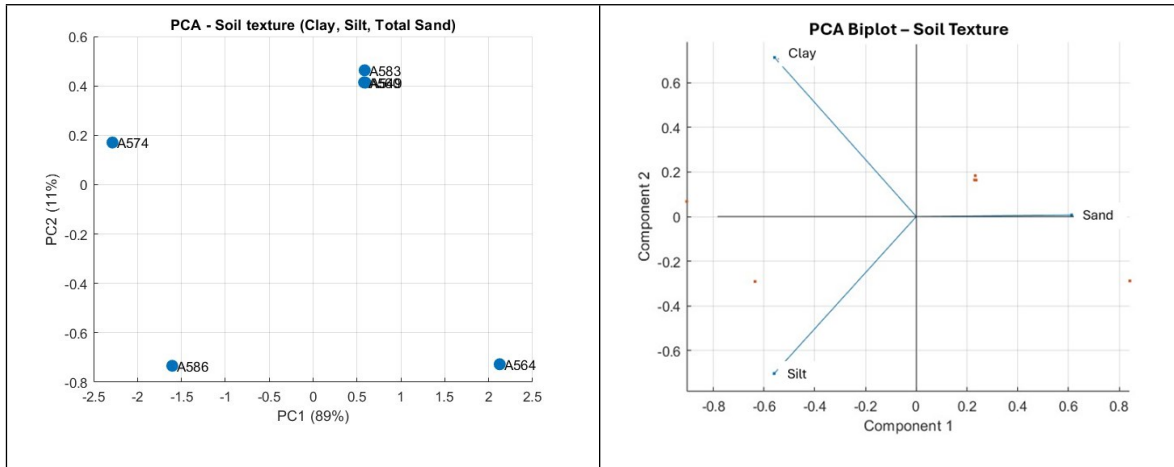

52

53 **Figure S4.** Principal component analysis (PCA) applied to the soil samples, based on ((a)  
 54 and (b)) chemical composition (Ca, Mg, and pH), and ((c) and (d)) texture (clay, silt, and  
 55 total sand). Plots (a) and (c) show the distribution of the samples in the space defined by the  
 56 first two principal components (PC1 and PC2), which explained most of the data variance  
 57 (93.1% and 6.8% for chemical composition; 89% and 11% for texture). Biplots (b) and (d)  
 58 display the correlations between the original variables and the main components, highlighting  
 59 the contribution of each parameter to sample differentiation.

60

61 **Table S4.** Absolute Red (R) channel values obtained for a 1.00 mg P L<sup>-1</sup> phosphate standard  
 62 solution under different environmental and lighting conditions, with and without the use of  
 63 the photographic box. Results are expressed as mean ± standard deviation (n = 3) under intra-  
 64 day repeatability conditions. The region of interest (ROI) area was fixed at 4421 px<sup>2</sup> for all  
 65 measurements.

| Location                              | Absolute R values – 1,00 mg P L <sup>-1</sup> |                                   | ROI Area (px <sup>2</sup> ) |
|---------------------------------------|-----------------------------------------------|-----------------------------------|-----------------------------|
|                                       | Using the photography box                     | Without using the photography box |                             |
| Inside the laboratory                 | 102,3 ± 7                                     | 64 ± 27                           | 4421                        |
| Outside the laboratory –<br>Sunny day | 109,3 ± 7                                     | 43,1 ± 14                         | 4421                        |
| Outside the laboratory -<br>cloudy    | 109,2 ± 7                                     | 16 ± 4                            | 4421                        |

66

67

68

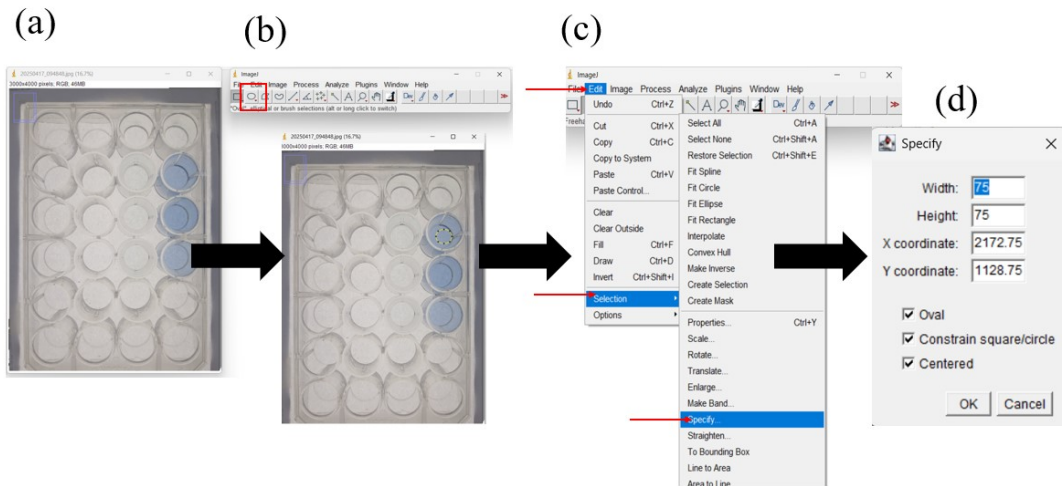

69

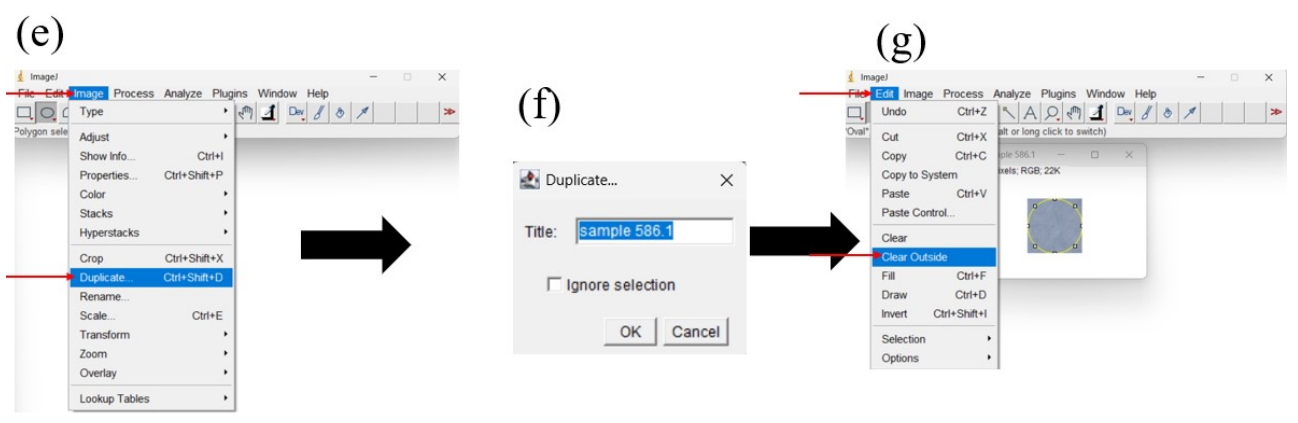

70

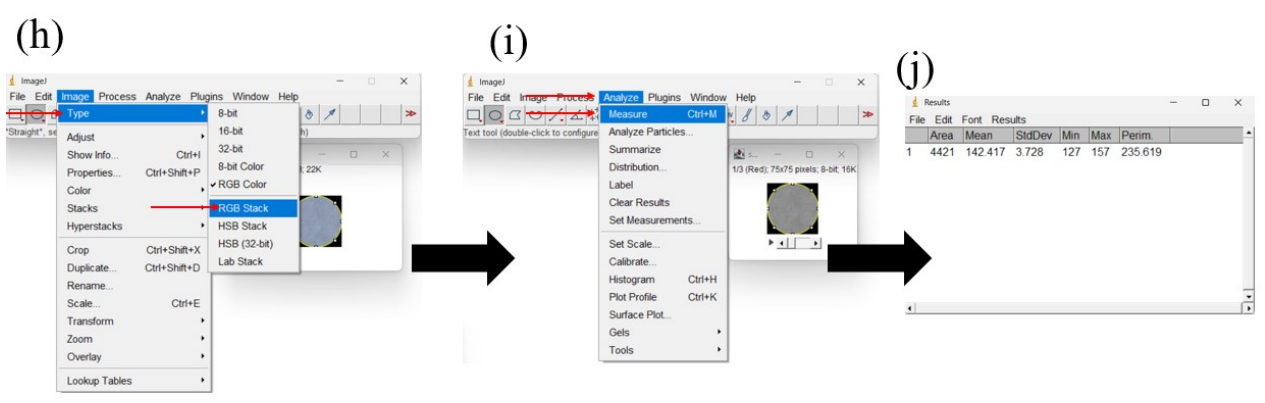

71

72 **Figure S5.** Step-by-step guideline of the procedure performed using ImageJ. (a) The sample  
 73 image was opened in the software. (b) The oval selection tool was used to define the region  
 74 of interest (ROI) on the original image. (c) The selected area was standardized by accessing  
 75 *Edit > Selection > Specify*. (d) Predefined width and height values were entered to ensure  
 76 consistent ROI dimensions. (e) The selected region was duplicated via *Image > Duplicate*.

77 (f) The duplicated image was renamed and confirmed by clicking “OK”. (g) The area outside  
78 the circular ROI was removed using *Edit > Clear Outside*. (h) The duplicated image was  
79 separated into RGB channels by selecting *Image > Type > RGB Stack*, generating three  
80 sequential stacks corresponding to the Red, Green, and Blue channels. (i) The intensity of  
81 the Red channel was determined using *Analyze > Measure*. (j) The software generated a  
82 results window containing the area, mean R value, standard deviation, minimum and  
83 maximum pixel values, and perimeter. The results were exported and saved as a .csv file for  
84 subsequent analysis.

85

86
